# Supplementary material
Source: PubMed Central journal article supplement (PMC166210)
Supplement: pnas_100_14_8223__2.pdf [file pnas_100_14_8223__2.pdf]

| $m$                  | 0                  | 1           | 2                     | 3           | 4                  |
|----------------------|--------------------|-------------|-----------------------|-------------|--------------------|
| $E_{1m0}(A_{1m0}^B)$ | 0.511(0.38)        | 0.117(0.47) | -0.310(0.58)          | -7.10(1.0)  | -22.4(1.0)         |
| $E_{1m1}(A_{1m1}^B)$ | 15.1(0.0)          | 1.39(0.2)   | 0.939(0.28)           | 0.535(0.37) | 0.53(0.37)         |
| $E_{2m0}(A_{2m0}^B)$ | $\infty(0.0)$      | -           | -0.771(0.68)          | -           | -0.913(0.71)       |
| $E_{2m1}(A_{2m1}^B)$ | -                  | -           | 14.1(0.0)             | -           | 7.68(0.0)          |
| $K_{1m}$             | $7.06 \times 10^7$ | 103         | 49.0                  | 0.118       | 8.16               |
| $K_{2m}$             | $\infty$           | -           | $1.91 \times 10^{11}$ | -           | $2.84 \times 10^8$ |

| $C_{qq'}$ | $q' = 1$ | $q' = 2$ |
|-----------|----------|----------|
| $q = 1$   | -0.0349  | -5.26    |
| $q = 2$   | -7.0     | -0.00066 |
