# Supplementary material
Source: PubMed Central journal article supplement (PMC166210)

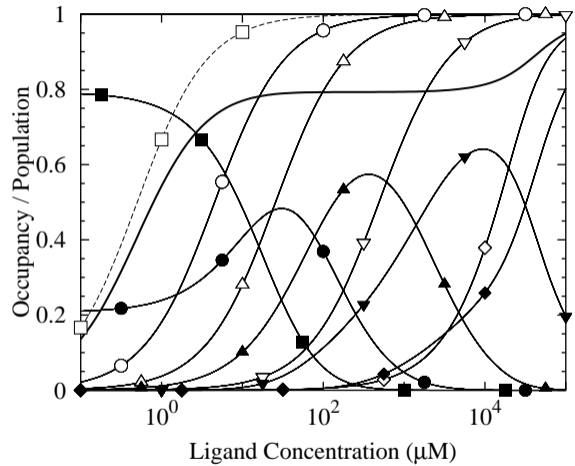

0 □ 1 ○ 2 △ 3 ▽ 4 ◇

Supplement: pnas_100_14_8223__10.pdf [file pnas_100_14_8223__10.pdf]

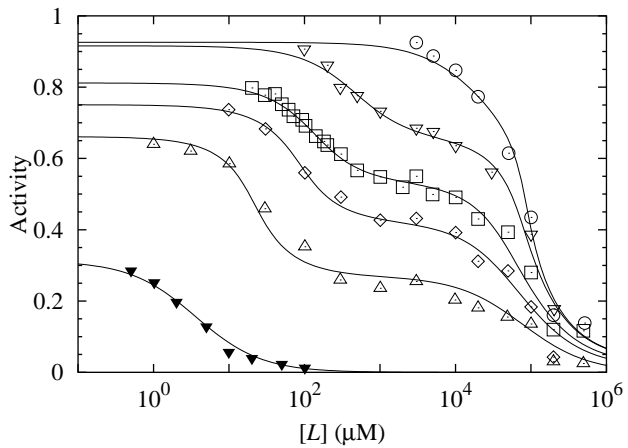

Supplement: pnas_100_14_8223__4.pdf [file pnas_100_14_8223__4.pdf]

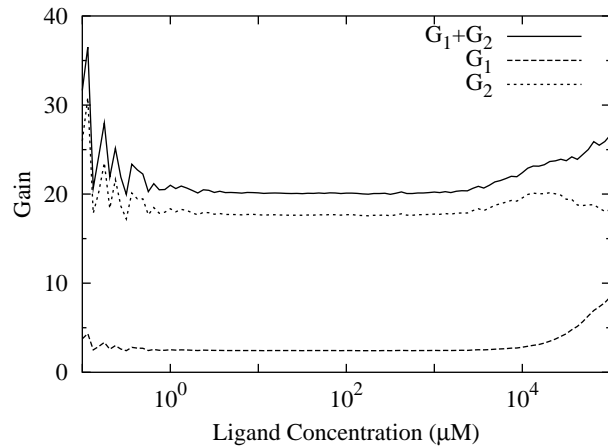

Supplement: pnas_100_14_8223__6.pdf [file pnas_100_14_8223__6.pdf]

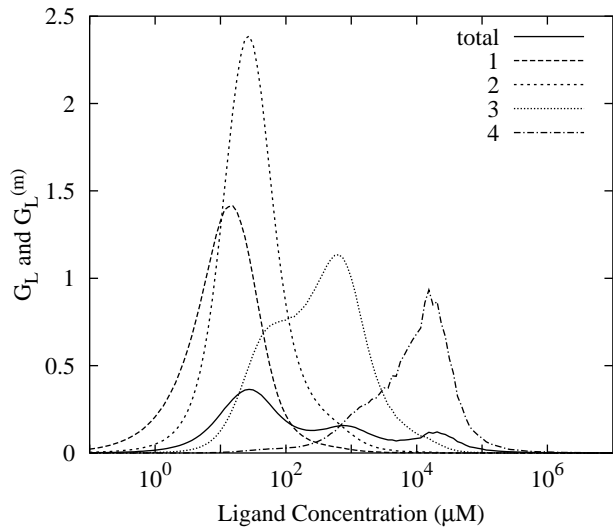

Supplement: pnas_100_14_8223__8.pdf [file pnas_100_14_8223__8.pdf]
